# Supplementary material
Source: Springer Nature journal article supplement (https://www.springermedizin.de/resource/supplementary/12943_2006_156_MOESM10_ESM.pdf/9553564)

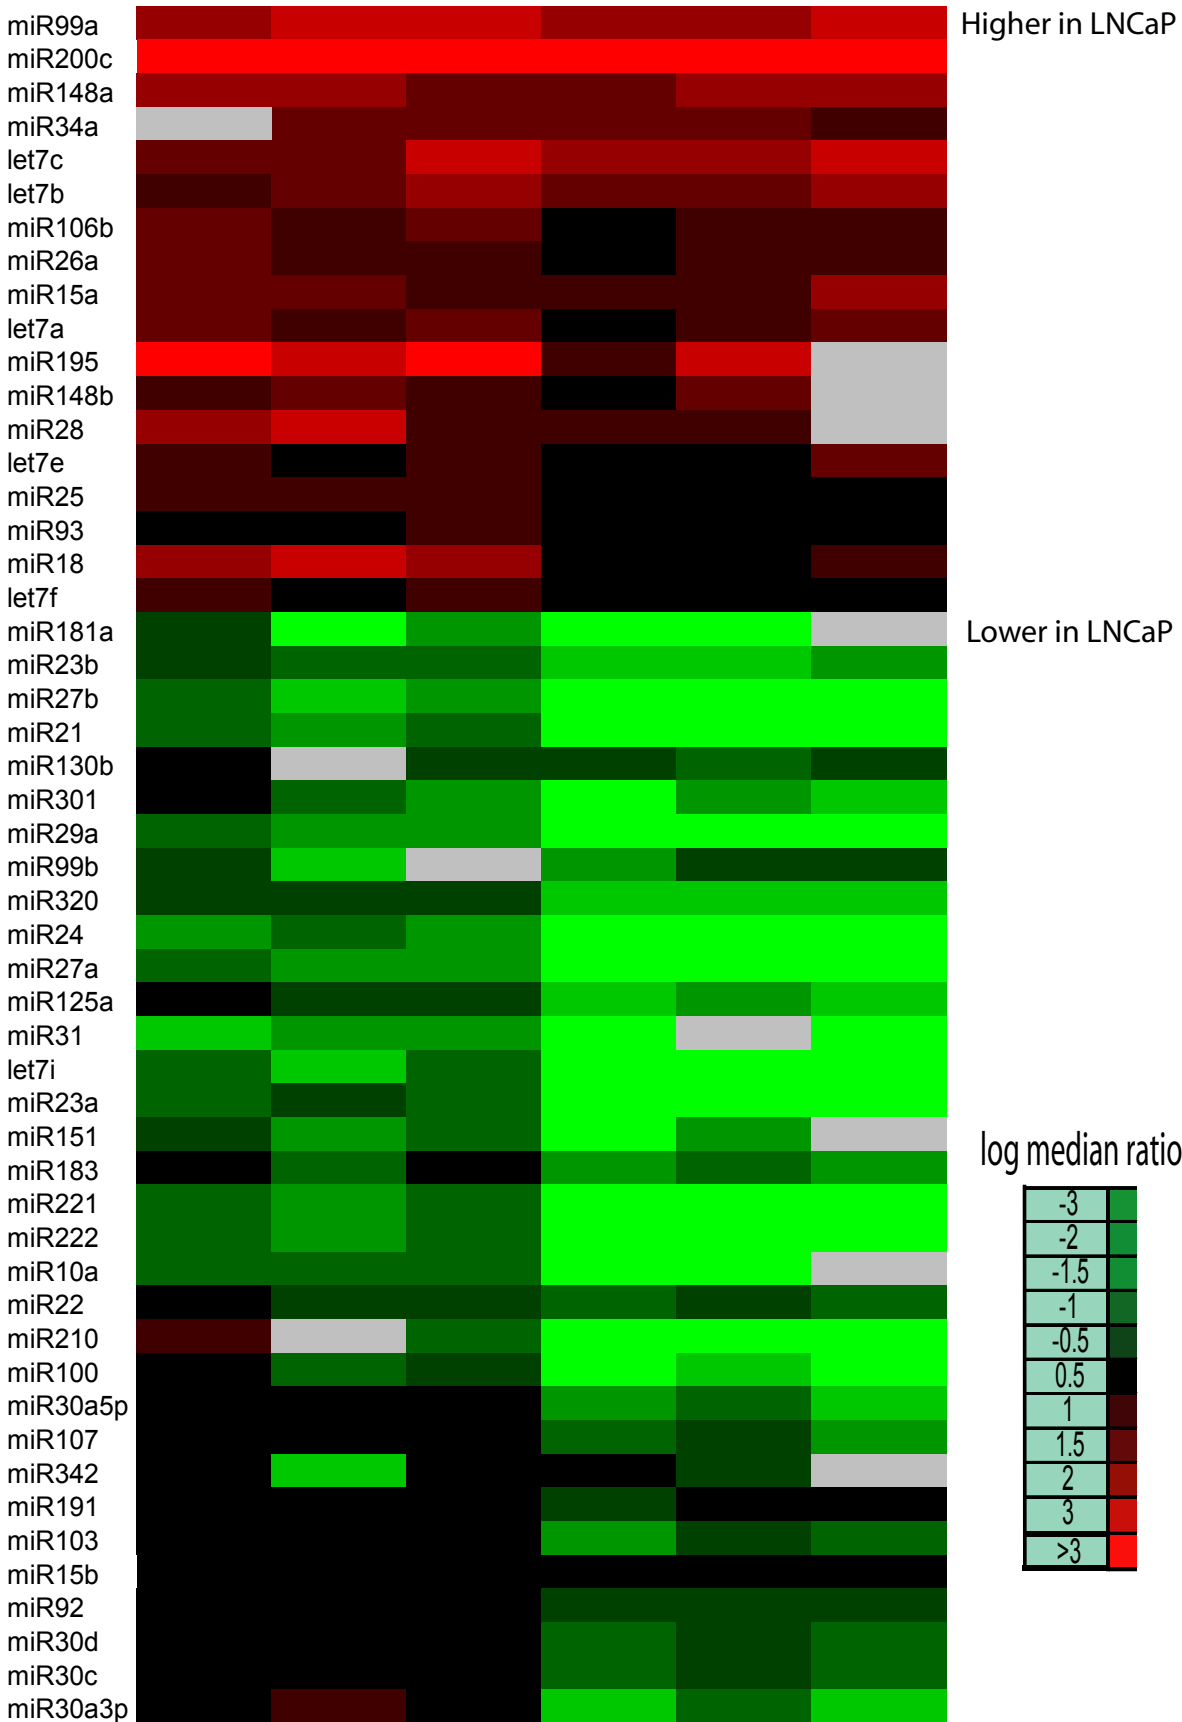

Supplement: MOESM10 [file 9553564]
